# Supplementary material
Source: MDPI journal article supplement (https://www.mdpi.com/2305-6304/1/1/36)
Supplement: s1 [file s1]

## Supplementary Information

**Table S1.** Relative lung weights from male rats after subchronic exposure to silver nanoparticles (obtained from Song *et al.* [6]).

| Group:<br>(mean ±S.E) | Control    |     | Low        |     | Middle     |     | High                    |     |
|-----------------------|------------|-----|------------|-----|------------|-----|-------------------------|-----|
| LUNG (LEFT)           | 0.12 ±0.01 | (5) | 0.12 ±0.00 | (5) | 0.13 ±0.00 | (5) | 0.14 ±0.00 <sup>a</sup> | (5) |
| LUNG (RIGHT)          | 0.24 ±0.01 | (5) | 0.23 ±0.00 | (5) | 0.26 ±0.01 | (5) | 0.27 ±0.01 <sup>b</sup> | (5) |

( ): number; <sup>a</sup>:  $p < 0.05$ , high vs. control, low, and medium groups; <sup>b</sup>:  $p < 0.01$ , high vs. control, low, and medium groups; Note: Among the 9 rats sacrificed after 12 weeks of exposure, the lung weights were only measured from 4 rats.

**Table S2.** Particle size distributions and concentrations of silver nanoparticles (mean ±S.E) in inhalation chambers (obtained from Song *et al.* [6]).

| Group   | Diameter # (nm) | Number (particles/cm <sup>3</sup> )     | Surface area (nm <sup>2</sup> /cm <sup>3</sup> ) | Mass (µg/m <sup>3</sup> ) |
|---------|-----------------|-----------------------------------------|--------------------------------------------------|---------------------------|
| Control | 0               | 0                                       | 0                                                | 0                         |
| Low     | 14.54 (1.62)    | $0.66 \times 10^6 \pm 0.54 \times 10^4$ | $0.76 \times 10^9 \pm 1.11 \times 10^7$          | $48.76 \pm 1.03$          |
| Middle  | 14.38 (1.64)    | $1.41 \times 10^6 \pm 0.64 \times 10^4$ | $1.70 \times 10^9 \pm 2.56 \times 10^7$          | $117.14 \pm 2.56$         |
| High    | 15.00 (1.75)    | $3.24 \times 10^6 \pm 0.94 \times 10^4$ | $4.85 \times 10^9 \pm 5.91 \times 10^7$          | $381.43 \pm 5.90$         |

# : GM (GSD).

**Table S3.** Lung silver concentrations after 12 weeks of exposure (ng/g of wet tissue) (obtained from Song *et al.* [6]).

| Control (n)    | Low (n)           | Middle (n)          | High (n)              |
|----------------|-------------------|---------------------|-----------------------|
| 0.82 ±0.21 (9) | 80.65 ±8.54 * (9) | 417.40 ±32.08 * (9) | 4715.28 ±212.13 * (9) |

\*  $p < 0.05$ , compared with control group.
